# Supplementary material
Source: PubMed Central journal article supplement (PMC3083215)
Supplement: supp_M110.182527_jbc.M110.182527-1.pdf [file supp_M110.182527_jbc.M110.182527-1.pdf]

**SUPPLEMENTAL DATA:**

**EDD INHIBITS ATM-MEDIATED PHOSPHORYLATION OF P53**

Shiyun Ling and Weei-Chin Lin

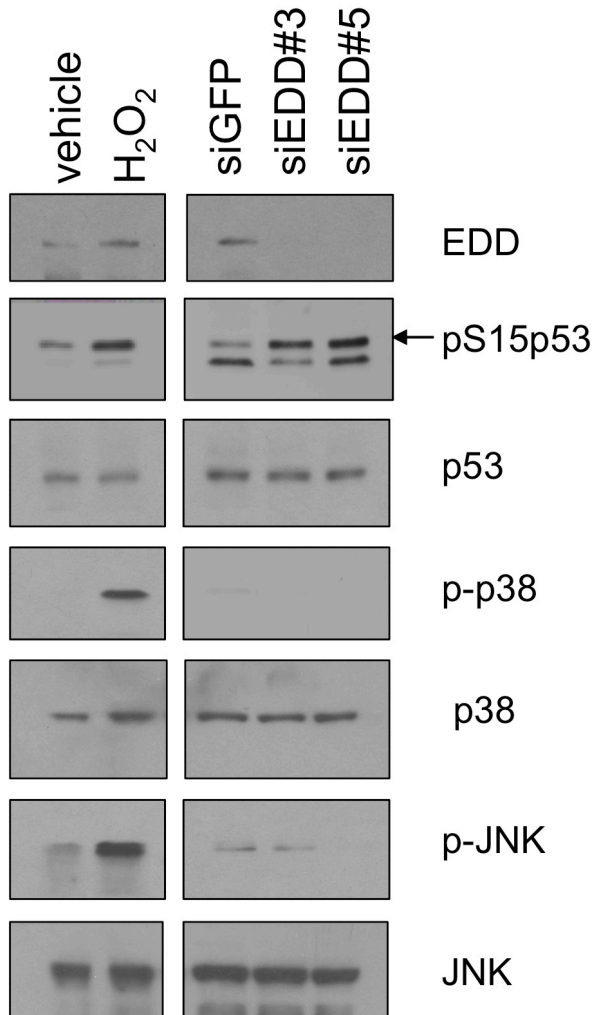

Supplemental Fig. 1:

WI38 cells were infected with Ad-siGFP, Ad-siEDD#3 or Ad-siEDD#5 at a multiplicity of infection of 300 for 3 days or treated with H<sub>2</sub>O<sub>2</sub> (200  $\mu$ M) for 40 min. Cell lysates were subject to Western blot analysis and the immunoblot was probed with indicated antibodies.

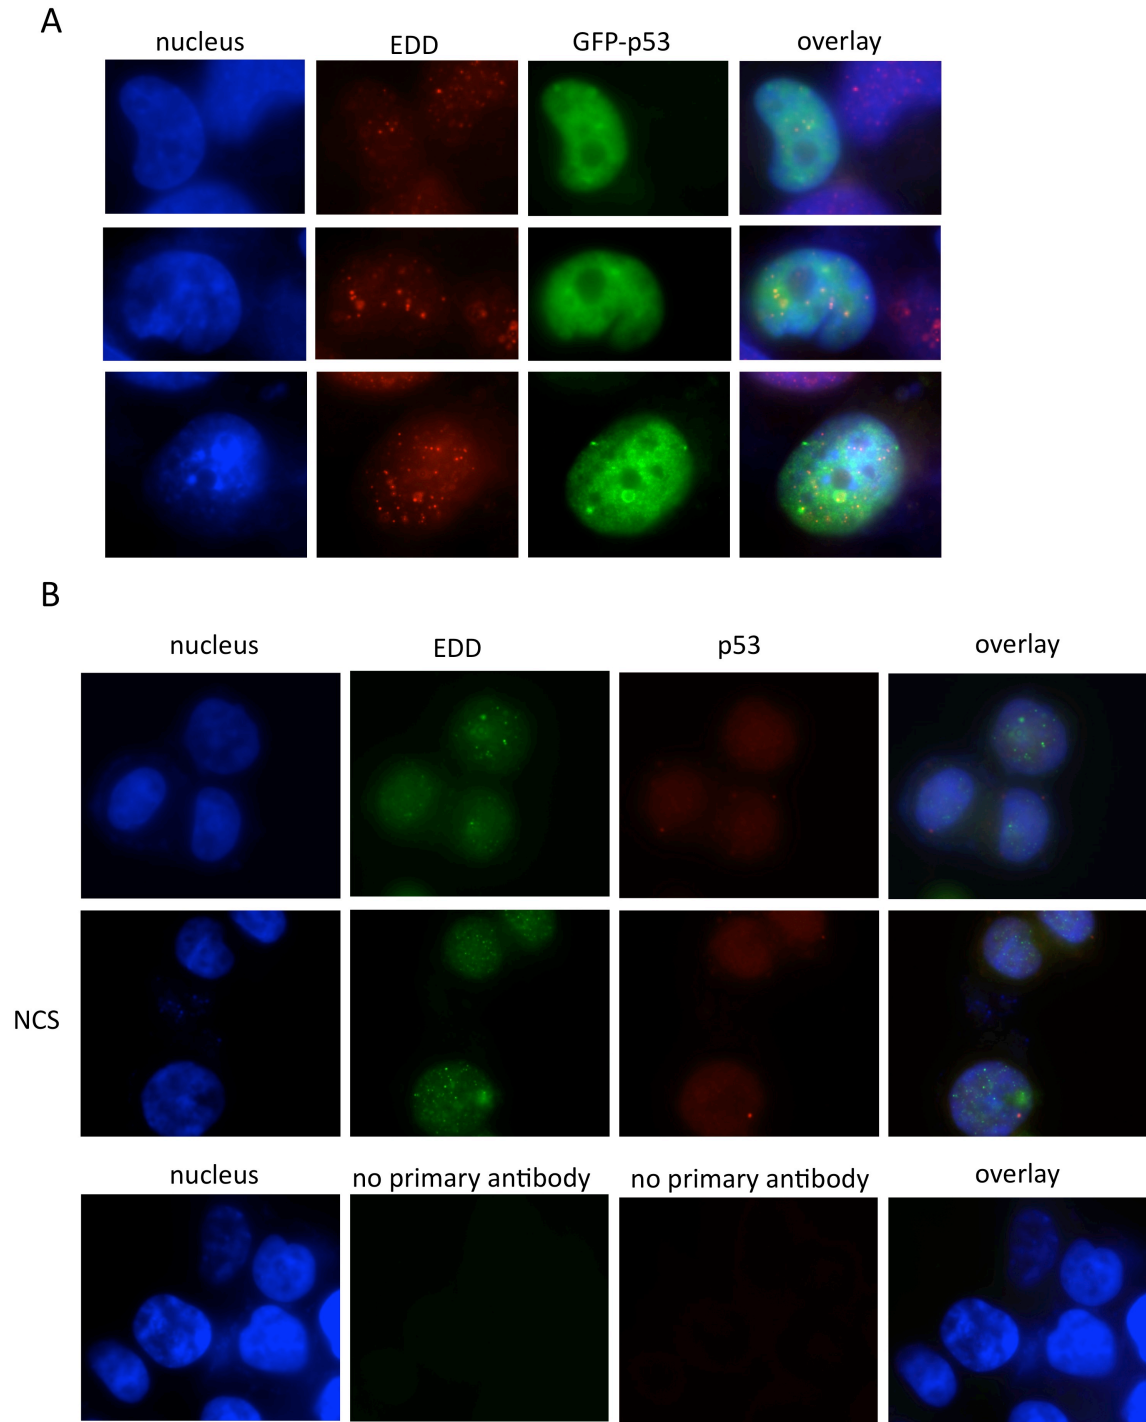

Supplemental Fig. 2:

A. H1299 cells were transfected with GFP-p53. Forty-eight hours later, cells were fixed and stained with antibodies to EDD.

B. HCT116 cells were either left untreated or treated with NCS. One hour later, cells were fixed and stained with an antibody against EDD or mixed monoclonal p53 antibodies containing DO1, PAb1801, PAb240 and PAb421. The bottom panels represent a control staining with fluorescein isothiocyanate- and Texas Red X-conjugated secondary antibodies only.
